# Supplementary material
Source: publisher figshare collection journal article supplement (https://brill.figshare.com/ndownloader/files/28516647)
Supplement: Supplementary file 1 [file 28516647]

# **Perceptions of Audio-Visual Impact Events in Younger and Older Adults**

**Katherine Bak**<sup>1,2,\*</sup>, **George S.W. Chan**<sup>2,\*\*</sup>, **Michael Schutz**<sup>3,4,\*\*\*</sup> and  
**Jennifer L. Campos**<sup>1,2,\*\*\*\*</sup>

<sup>1</sup> Department of Psychology, University of Toronto, 27 King's College Circle,  
Toronto, ON, Canada, M5S 1A1

<sup>2</sup> The KITE Research Institute-University Health Network, 550 University  
Avenue, Toronto, ON, Canada, M5G 2A2

<sup>3</sup> School of the Arts, McMaster University, 1280 Main Street West, Hamilton,  
ON, Canada, L8S 4L8

<sup>4</sup> Department of Psychology, Neuroscience, and Behaviour, McMaster  
University, 1280 Main Street West, Hamilton, ON, Canada, L8S 4L8

Received 23 December 2021; accepted 17 June 2021

\* ORCID: 0000-0003-3628-671X

\*\* ORCID: 0000-0002-3442-4691

\*\*\* ORCID: 0000-0002-6882-5928

\*\*\*\* To whom correspondence should be addressed. E-mail: [Jennifer.Campos@uhn.ca](mailto:Jennifer.Campos@uhn.ca)
